# Supplementary material
Source: PubMed Central journal article supplement (PMC7815903)

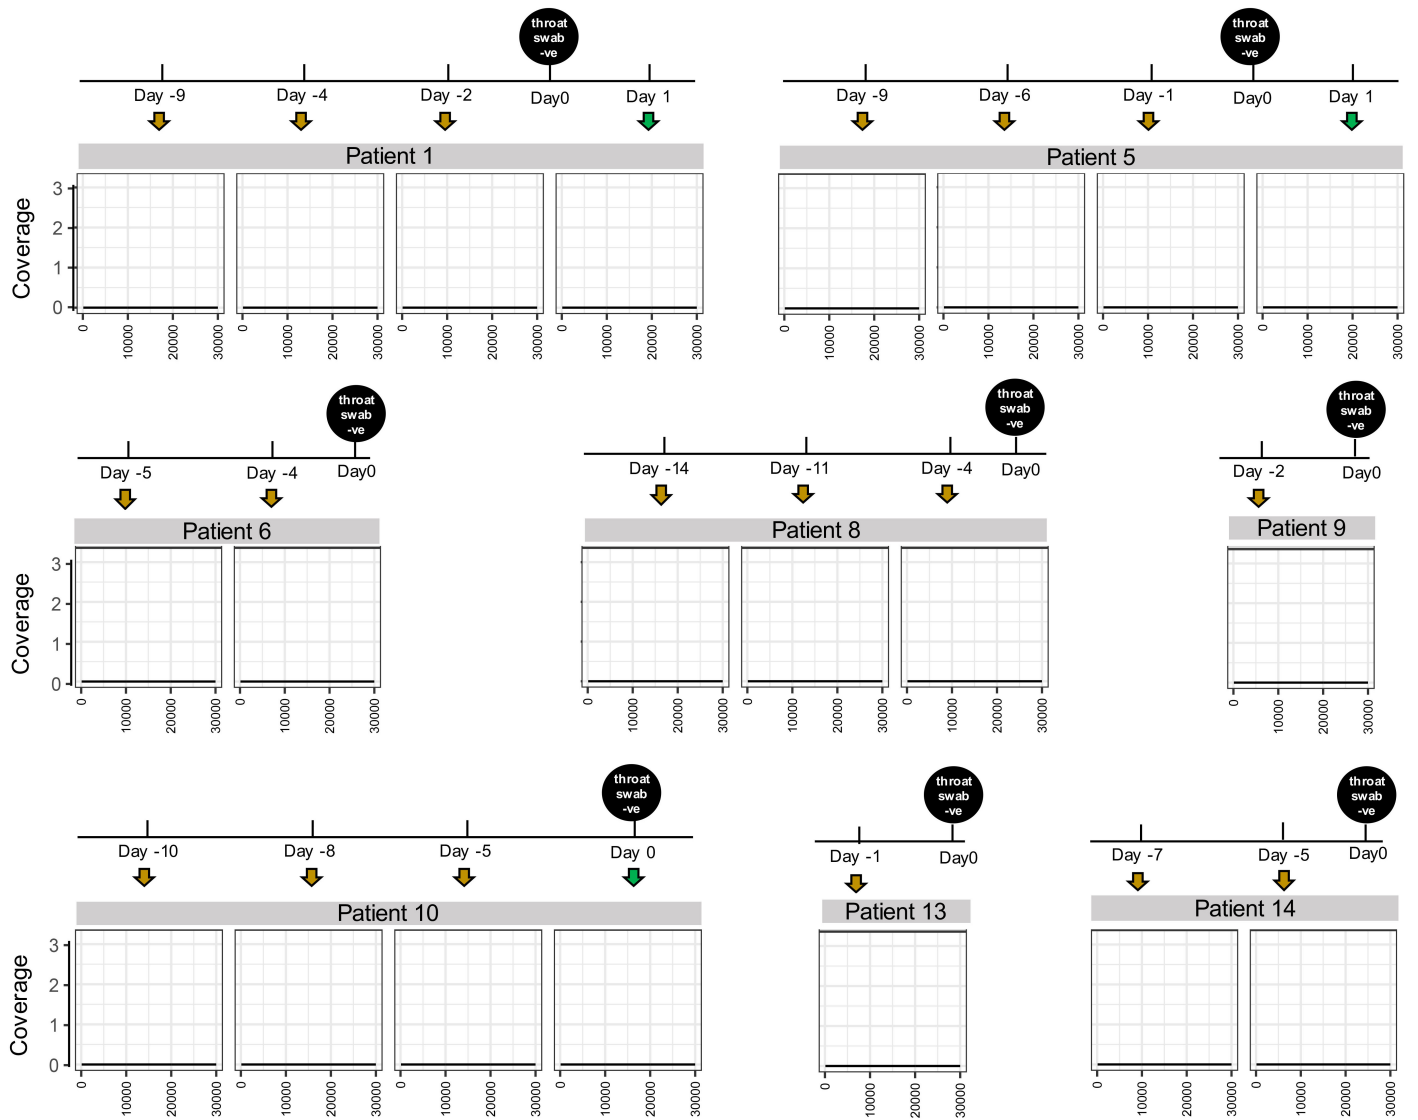

Supplement: gutjnl-2020-322294supp001.pdf [file gutjnl-2020-322294supp001.pdf]

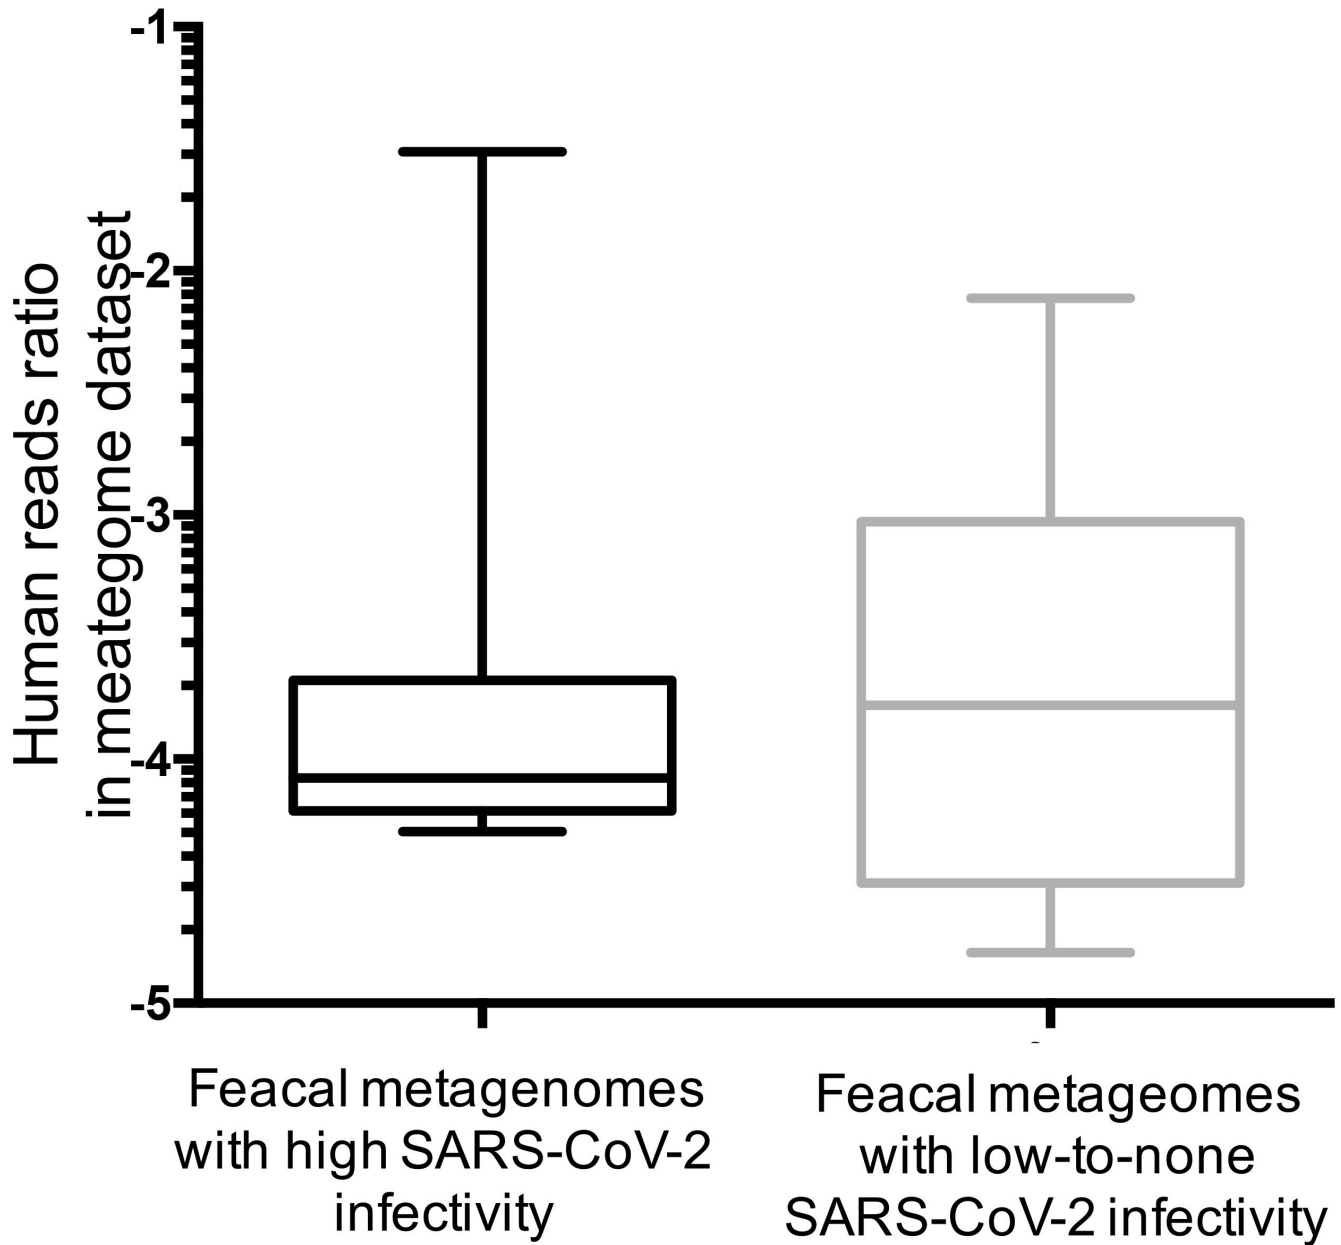

Supplement: gutjnl-2020-322294supp002.pdf [file gutjnl-2020-322294supp002.pdf]
